# Supplementary material
Source: PubMed Central journal article supplement (PMC10840387)

**A**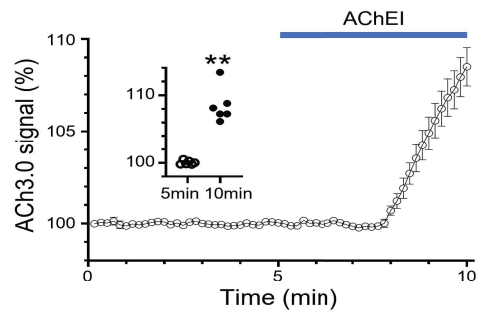**B**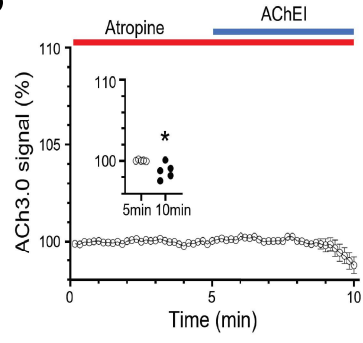

Supplement: NIHMS1924156-supplement-1.pdf [file NIHMS1924156-supplement-1.pdf]

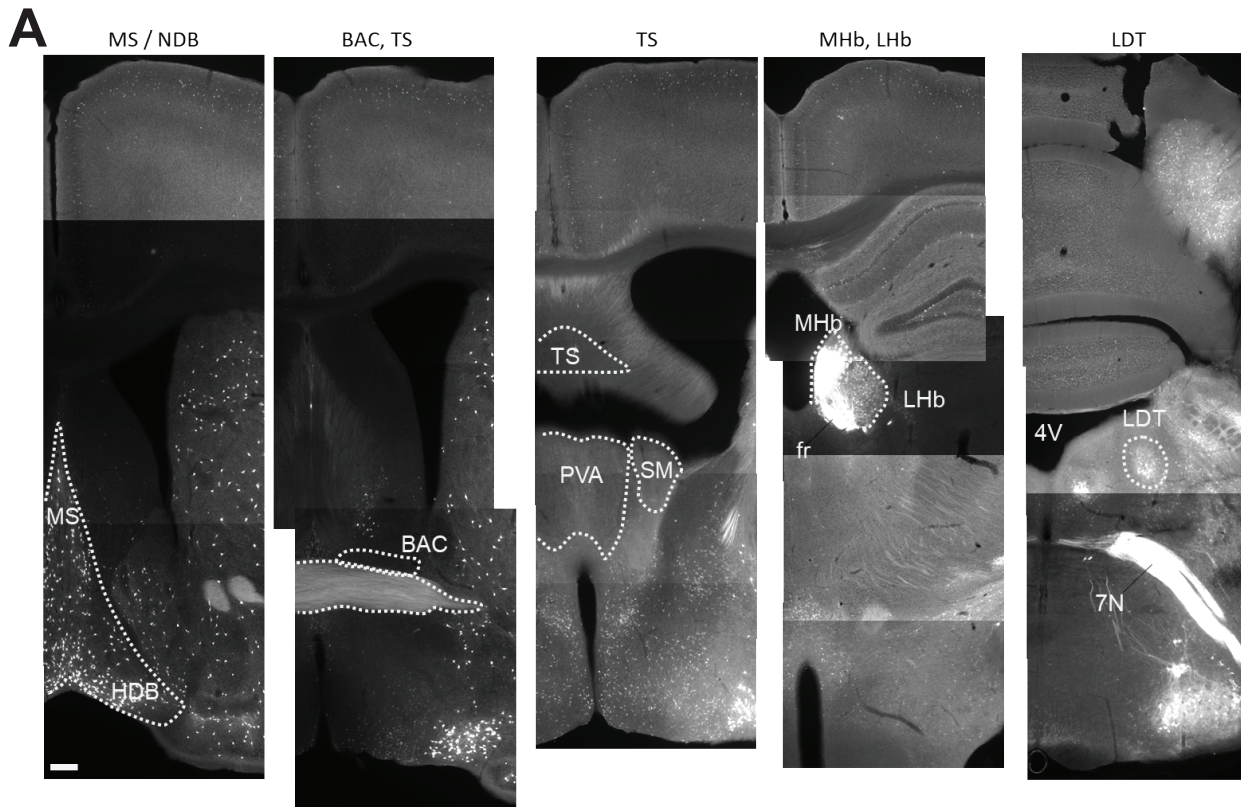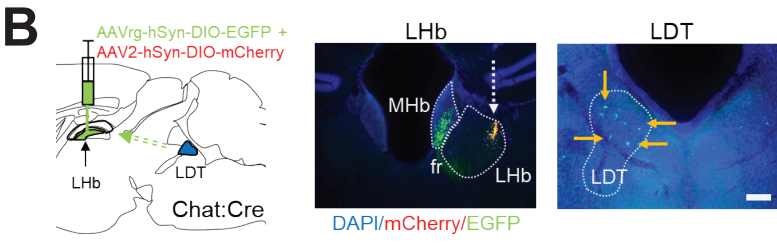

Supplement: NIHMS1924156-supplement-2.pdf [file NIHMS1924156-supplement-2.pdf]

**A**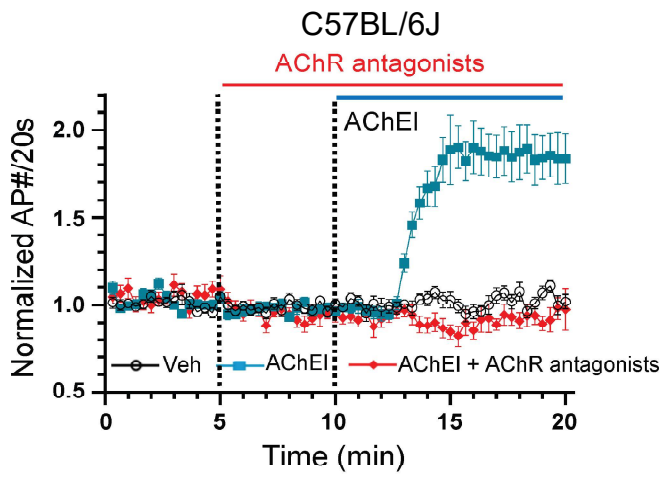**B**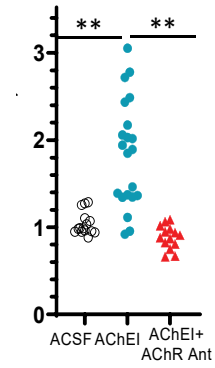**C**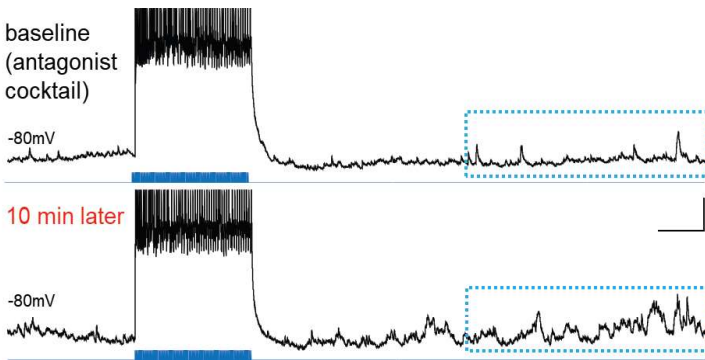**D**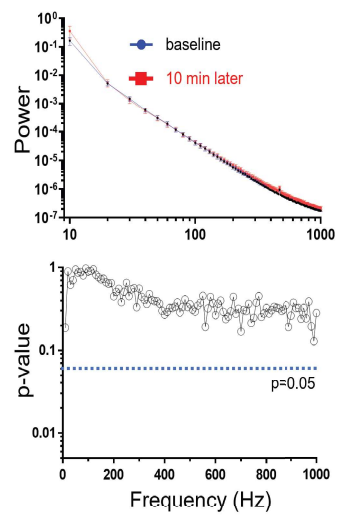**E**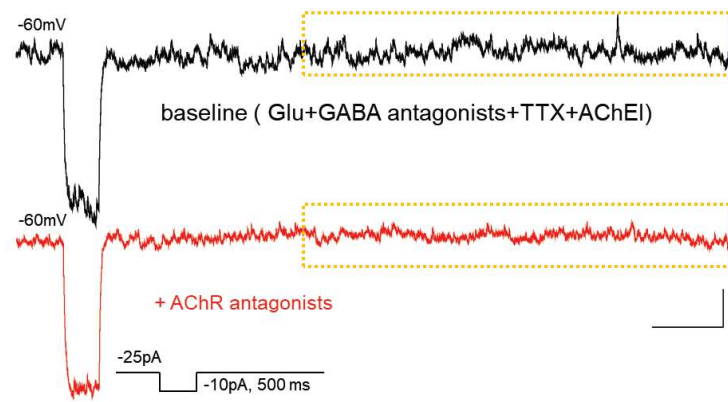**F**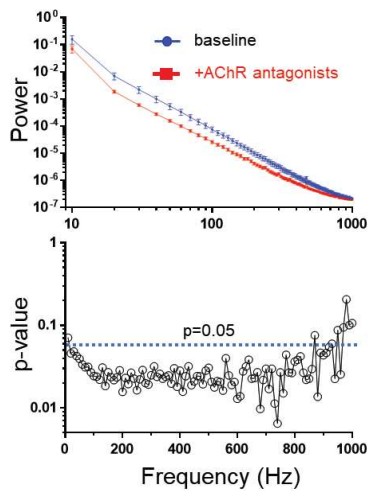**G**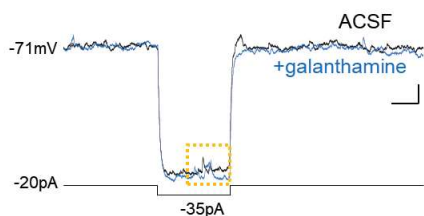**H**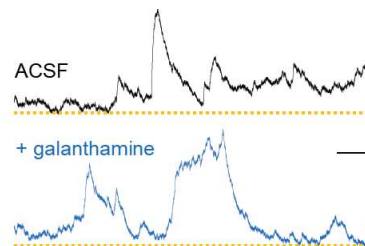**I**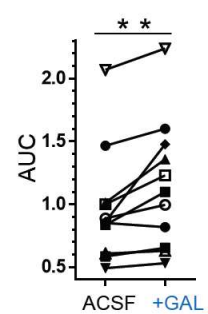

Supplement: NIHMS1924156-supplement-4.pdf [file NIHMS1924156-supplement-4.pdf]
